# Supplementary material for: Suicide after a Diagnosis of Cancer: Follow-Up of 1.4 Million Individuals, 2009–2019
Source: MDPI journal article supplement (doi:10.3390/cancers15174315), 2023-08-29
Supplement: s1 [file s1]

**Table S1.** Analysis by cancer site in the PolSCa study is based on the International Statistical Classification of Diseases and Related Health Problems 10th revision (ICD-10). Some site codes were combined to provide data comparable with the previous literature. For the reader's convenience, all sites appearing under the specific ICD-10 codes are listed under one collective name - label.

| ICD-10 code          | Sites included                                              | Label                  |
|----------------------|-------------------------------------------------------------|------------------------|
| <b>C00-C14 + C30</b> | Lip, oral cavity, pharynx, nasal cavity, and middle ear     | Head and neck          |
| <b>C15</b>           | Esophagus                                                   | Esophagus              |
| <b>C16</b>           | Stomach                                                     | Stomach                |
| <b>C17</b>           | Small intestine                                             | Small intestine        |
| <b>C18-C20</b>       | Colon, rectosigmoid junction, rectum                        | Colorectum             |
| <b>C21</b>           | Anus and anal canal                                         | Anus                   |
| <b>C22-24</b>        | Liver, intrahepatic bile ducts, gallbladder, biliary tract  | Liver and gallbladder  |
| <b>C25</b>           | Pancreas                                                    | Pancreas               |
| <b>C32</b>           | Larynx                                                      | Larynx                 |
| <b>C33</b>           | Trachea                                                     | Trachea                |
| <b>C34</b>           | Bronchus and lung                                           | Lung                   |
| <b>C37</b>           | Thymus                                                      | Thymus                 |
| <b>C38</b>           | Heart, mediastinum, and pleura                              | Heart and pleura       |
| <b>C40</b>           | Bone and articular cartilage of limbs                       | Appendicular skeleton  |
| <b>C41</b>           | Bone and articular cartilage of other and unspecified sites | Axial skeleton         |
| <b>C43</b>           | Malignant melanoma of skin                                  | Melanoma               |
| <b>C45-C49</b>       | Mesothelial and soft tissue                                 | Soft tissues           |
| <b>C50</b>           | Breast                                                      | Breast                 |
| <b>C51-C52</b>       | Vulva and vagina                                            | Vulva and vagina       |
| <b>C53</b>           | Cervix uteri                                                | Cervix uteri           |
| <b>C54-C55</b>       | Corpus uteri and uterus unspecified part                    | Corpus uteri           |
| <b>C56</b>           | Ovary                                                       | Ovary                  |
| <b>C60</b>           | Penis                                                       | Penis                  |
| <b>C61</b>           | Prostate                                                    | Prostate               |
| <b>C62</b>           | Testis                                                      | Testis                 |
| <b>C64</b>           | Kidney, except renal pelvis                                 | Kidney                 |
| <b>C65-C67</b>       | Renal pelvis, ureter, and bladder                           | Bladder                |
| <b>C69-C72</b>       | Eye, brain, and other parts of central nervous system       | Central nervous system |
| <b>C73</b>           | Thyroid gland                                               | Thyroid                |
| <b>C74</b>           | Adrenal gland                                               | Adrenal gland          |
| <b>C76, C80</b>      | Other and ill-defined sites and unspecified sites           | Unspecified site       |
| <b>C81-C88</b>       | Lymphoma                                                    | Lymphoma               |
| <b>C90</b>           | Multiple myeloma and malignant plasma cell neoplasms        | Multiple myeloma       |
| <b>C91-C96</b>       | Leukemia                                                    | Leukemia               |

**Table S2.** Characteristics of the study population.

| ICD-10        | Site                  | Number of persons under follow-up |         |         | Person-years under risk of suicide |           |           | Age at diagnosis, mean (SD) |                |                | Number of suicides |     |       |
|---------------|-----------------------|-----------------------------------|---------|---------|------------------------------------|-----------|-----------|-----------------------------|----------------|----------------|--------------------|-----|-------|
|               |                       | Overall                           | Men     | Women   | Overall                            | Men       | Women     | Overall                     | Men            | Women          | Overall            | Men | Women |
|               | <b>All cancers*</b>   | 1 426 661                         | 717 144 | 709 517 | 3 627 793                          | 1 622 638 | 2 005 155 | 64.1<br>(12.1)              | 65.1<br>(12.2) | 63.0<br>(13.8) | 830                | 683 | 147   |
| C00-C14 + C30 | Head and neck         | 43 136                            | 30 876  | 12 260  | 95 596                             | 63 816    | 31 780    | 61.8<br>(11.9)              | 61.1<br>(11.0) | 63.5<br>(13.7) | 49                 | 47  | 2     |
| C15           | Esophagus             | 13 799                            | 10 843  | 2 956   | 13 494                             | 10 099    | 3 395     | 64.2<br>(10.6)              | 63.4<br>(10.0) | 66.9<br>(12.1) | 11                 | 10  | 1     |
| C16           | Stomach               | 53 144                            | 34 001  | 19 143  | 80 512                             | 49 036    | 31 476    | 67.0<br>(12.1)              | 66.4<br>(11.5) | 67.9<br>(13.1) | 49                 | 46  | 3     |
| C17           | Small intestine       | 3 212                             | 1 657   | 1 555   | 7 962                              | 4 093     | 3 869     | 63.4<br>(12.8)              | 62.3<br>(12.5) | 64.7<br>(13.1) | 2                  | 2   | 0     |
| C18-C20       | Colorectum            | 178 267                           | 99 329  | 78 938  | 461 416                            | 250 212   | 211 205   | 67.6<br>(11.4)              | 67.1<br>(10.9) | 68.3<br>(12.0) | 134                | 121 | 13    |
| C21           | Anus                  | 2 785                             | 888     | 1 897   | 7 290                              | 2 008     | 5 282     | 64.8<br>(12.2)              | 62.9<br>(12.5) | 65.7<br>(12.0) | 2                  | 1   | 1     |
| C22-24        | Liver and gallbladder | 28 362                            | 12 693  | 15 669  | 32 707                             | 14 544    | 18 163    | 67.7<br>(11.6)              | 66.0<br>(11.3) | 69.1<br>(11.6) | 8                  | 7   | 1     |
| C25           | Pancreas              | 33 440                            | 16 477  | 16 963  | 29 050                             | 13 838    | 15 212    | 66.5<br>(11.4)              | 64.6<br>(10.8) | 68.4<br>(11.6) | 10                 | 9   | 1     |
| C32           | Larynx                | 23 362                            | 20 238  | 3 124   | 64 060                             | 54 629    | 9 431     | 63.0 (9.3)                  | 63.1<br>(9.3)  | 62.8 (9.5)     | 28                 | 24  | 4     |
| C33           | Trachea               | 308                               | 185     | 123     | 475                                | 248       | 227       | 62.9<br>(11.7)              | 63.4<br>(10.8) | 62.2<br>(12.9) | 0                  | 0   | 0     |
| C34           | Lung                  | 210 584                           | 140 184 | 70 400  | 265 661                            | 167 877   | 97 784    | 66.0 (9.5)                  | 66.2<br>(9.4)  | 65.7 (9.7)     | 100                | 89  | 11    |
| C37           | Thymus                | 790                               | 373     | 417     | 2 341                              | 1 100     | 1 241     | 57.0<br>(14.1)              | 55.4<br>(14.3) | 58.4<br>(13.7) | 0                  | 0   | 0     |
| C38           | Heart and pleura      | 1 428                             | 846     | 582     | 2 261                              | 1 283     | 978       | 63.5<br>(16.2)              | 61.7<br>(16.5) | 66.1<br>(15.4) | 2                  | 2   | 0     |
| C40           | Bone – limbs          | 1 472                             | 823     | 649     | 5 044                              | 2 682     | 2 362     | 45.4<br>(20.7)              | 43.4<br>(20.2) | 48.0<br>(21.1) | 0                  | 0   | 0     |
| C41           | Bone – axial skeleton | 1 770                             | 924     | 846     | 4 691                              | 2 219     | 2 472     | 53.0<br>(19.7)              | 52.8<br>(19.2) | 53.3<br>(20.3) | 1                  | 1   | 0     |
| C43           | Melanoma              | 34 653                            | 16 172  | 18 481  | 107 060                            | 46 248    | 60 812    | 60.1<br>(16.4)              | 61.1<br>(15.3) | 59.3<br>(17.3) | 18                 | 17  | 1     |
| C45-C49       | Soft tissues          | 13 272                            | 7 162   | 6 110   | 30 647                             | 15 470    | 15 177    | 60.4<br>(16.3)              | 59.9<br>(16.3) | 60.9<br>(16.4) | 6                  | 6   | 0     |
| C50           | Breast                | 187 919                           | 1 371   | 186 548 | 680 682                            | 4 053     | 676 629   | 60.6<br>(13.0)              | 65.9<br>(11.8) | 60.5<br>(13.0) | 48                 | 1   | 47    |
| C51-C52       | Vulva and vagina      | 6 433                             | -       | 6 433   | 15 393                             | -         | 15 393    | 70.4<br>(12.4)              | -              | 70.4<br>(12.4) | 3                  | -   | 3     |

| ICD-10   | Site                   | Number of persons under follow-up |         |        | Person-years under risk of suicide |         |         | Age at diagnosis, mean (SD) |                |                | Number of suicides |     |       |
|----------|------------------------|-----------------------------------|---------|--------|------------------------------------|---------|---------|-----------------------------|----------------|----------------|--------------------|-----|-------|
|          |                        | Overall                           | Men     | Women  | Overall                            | Men     | Women   | Overall                     | Men            | Women          | Overall            | Men | Women |
| C53      | Cervix uteri           | 28 903                            | -       | 28 903 | 90 365                             | -       | 90 365  | 57.1<br>(13.7)              | -              | 57.1<br>(13.7) | 10                 | -   | 10    |
| C54-C55  | Corpus uteri           | 61 037                            | -       | 61 037 | 215 944                            | -       | 215 944 | 64.1<br>(10.8)              | -              | 64.1<br>(10.8) | 12                 | -   | 12    |
| C56      | Ovary                  | 37 976                            | -       | 37 976 | 102 438                            | -       | 102 438 | 60.1<br>(13.5)              | -              | 60.1<br>(13.5) | 8                  | -   | 8     |
| C60      | Penis                  | 2 549                             | 2 549   | -      | 6 929                              | 6 929   | -       | 64.8<br>(12.7)              | 64.8<br>(12.7) | -              | 2                  | 2   | -     |
| C61      | Prostate               | 142 079                           | 142 079 | -      | 432 193                            | 432 193 | -       | 69.0 (8.4)                  | 69.0<br>(8.4)  | -              | 133                | 133 | -     |
| C62      | Testis                 | 12 193                            | 12 193  | -      | 51 221                             | 51 221  | -       | 34.6<br>(11.7)              | 34.6<br>(11.7) | -              | 18                 | 18  | -     |
| C64      | Kidney                 | 51 349                            | 30 915  | 20 434 | 155 159                            | 89 332  | 65 826  | 63.9<br>(11.6)              | 63.0<br>(11.2) | 65.4<br>(11.9) | 32                 | 27  | 5     |
| C65-C67  | Bladder                | 74 785                            | 56 193  | 18 592 | 206 075                            | 153 743 | 52 332  | 68.5<br>(10.9)              | 68.5<br>(10.7) | 68.3<br>(11.5) | 63                 | 61  | 2     |
| C69-C72  | Central nervous system | 32 663                            | 16 364  | 16 299 | 65 452                             | 31 039  | 34 413  | 58.6<br>(16.1)              | 57.1<br>(15.8) | 60.2<br>(16.3) | 11                 | 9   | 2     |
| C73      | Thyroid gland          | 34 448                            | 5 800   | 28 648 | 123 578                            | 19 403  | 104 176 | 49.9<br>(15.6)              | 51.9<br>(15.8) | 49.5<br>(15.5) | 8                  | 2   | 6     |
| C74      | Adrenal gland          | 1 072                             | 479     | 593    | 2 935                              | 1 124   | 1 811   | 59.0<br>(15.2)              | 59.0<br>(15.0) | 58.9<br>(15.5) | 0                  | 0   | 0     |
| C76, C80 | Unspecified site       | 16 663                            | 8 205   | 8 458  | 16 217                             | 7 556   | 8 662   | 68.3<br>(12.8)              | 66.2<br>(12.2) | 70.5<br>(13.1) | 10                 | 8   | 2     |
| C81-C88  | Lymphoma               | 38 841                            | 19 466  | 19 375 | 119 243                            | 58 128  | 61 115  | 58.3<br>(18.4)              | 57.5<br>(17.9) | 59.1<br>(18.8) | 23                 | 14  | 9     |
| C90      | Multiple myeloma       | 15 477                            | 7 294   | 8 183  | 36 408                             | 16 606  | 19 802  | 66.9<br>(11.1)              | 65.8<br>(11.2) | 67.9<br>(10.9) | 11                 | 9   | 2     |
| C91-C96  | Leukemia               | 32 611                            | 17 957  | 14 654 | 85 566                             | 46 764  | 38 802  | 64.3<br>(15.5)              | 63.1<br>(15.4) | 65.9<br>(15.4) | 18                 | 17  | 1     |

\* All primary malignant neoplasms except non-melanoma skin cancers (C00-C43, C45-C76, C80-C96 according to the ICD-10).

**Table S3.** Mechanism of suicide among patients with cancer by sex – Poland, 2009-2019.

| ICD 10 code and mechanism of suicide                                                                                                                   | Overall | Men    | Women  |
|--------------------------------------------------------------------------------------------------------------------------------------------------------|---------|--------|--------|
| X60. Intentional self-poisoning by and exposure to nonopioid analgesics, antipyretics and antirheumatics                                               | 0.11%   | 0.00%  | 0.63%  |
| X61. Intentional self-poisoning by and exposure to antiepileptic, sedative-hypnotic, antiparkinsonism and psychotropic drugs, not elsewhere classified | 0.33%   | 0.26%  | 0.63%  |
| X64. Intentional self-poisoning by and exposure to other and unspecified drugs, medicaments and biological substances                                  | 0.65%   | 0.00%  | 3.75%  |
| X65. Intentional self-poisoning by and exposure to alcohol                                                                                             | 2.94%   | 3.16%  | 1.88%  |
| X67. Intentional self-poisoning by and exposure to carbon monoxide and other gases and vapours                                                         | 0.22%   | 0.13%  | 0.63%  |
| X69. Intentional self-poisoning by and exposure to other and unspecified chemicals and noxious substances                                              | 0.11%   | 0.13%  | 0.00%  |
| X70. Intentional self-harm by hanging, strangulation and suffocation                                                                                   | 84.55%  | 86.69% | 74.38% |
| X71. Intentional self-harm by drowning and submersion                                                                                                  | 0.87%   | 0.66%  | 1.88%  |
| X72. Intentional self-harm by handgun discharge                                                                                                        | 0.76%   | 0.92%  | 0.00%  |
| X73. Intentional self-harm by rifle, shotgun and larger firearm discharge                                                                              | 0.44%   | 0.40%  | 0.63%  |
| X74. Intentional self-harm by other and unspecified firearm discharge                                                                                  | 0.44%   | 0.53%  | 0.00%  |
| X75. Intentional self-harm by explosive material                                                                                                       | 0.11%   | 0.13%  | 0.00%  |
| X78. Intentional self-harm by sharp object                                                                                                             | 2.39%   | 2.24%  | 3.13%  |
| X79. Intentional self-harm by blunt object                                                                                                             | 0.11%   | 0.00%  | 0.63%  |
| X80. Intentional self-harm by jumping from a high place                                                                                                | 4.90%   | 4.08%  | 8.75%  |
| X81. Intentional self-harm by jumping or lying before moving object                                                                                    | 0.44%   | 0.13%  | 1.88%  |
| X83. Intentional self-harm by other specified means                                                                                                    | 0.22%   | 0.13%  | 0.63%  |
| X84. Intentional self-harm by unspecified means                                                                                                        | 0.44%   | 0.40%  | 0.63%  |
